# Supplementary material
Source: PubMed Central journal article supplement (PMC1885606)

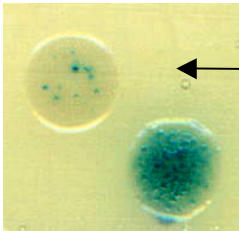

Wild type strain

Hyper-recombination mutant

Supplement: pnas_0610149104_1.pdf [file pnas_0610149104_1.pdf]
